# Supplementary material
Source: publisher figshare collection journal article supplement (https://acs.figshare.com/ndownloader/files/14531405)
Supplement: Supplementary file 1 [file 14531405]

# A Predictive Model to Probe the Impact of Gravity and Surface Tension on Rising Wetting Thin Films

Zhen Luo and Shafigh Mehraeen\*

*Department of Chemical Engineering, University of Illinois at Chicago  
810 South Clinton Street, Chicago, Illinois 60607, United States*

E-mail: tranzabi@uic.edu

Phone: +1 (0)312 9968734. Fax: +1 (0)312 9960808

## Supporting Information

In addition to the structure factor,  $S(k, t)$ , illustrated in Fig. 5 of the manuscript, we verified the structure factor for  $g' = 0.01, \sigma = 0$ , at 5 logarithmically spaced KMC time units between  $t = 10^3$  and  $10^6$  with  $L_x = 512$  averaged over 200 independent KMC simulations, as shown in Fig. S1, indicating  $\alpha \approx 0.35$ .

Results shown in Fig. S1 suggest that for rather large  $\alpha$ , the interface roughness is partly correlated with the longest wave length that can be formed during the rise of the liquid layer.

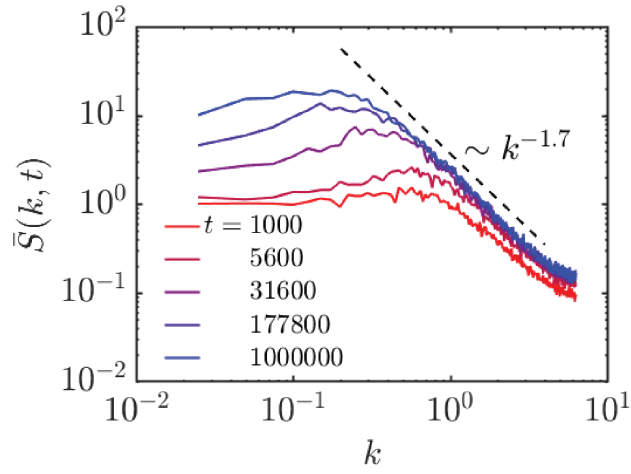

**Figure S1.** Structure factor of the interface roughness at 5 logarithmically spaced KMC time units between  $t = 10^3$ , and  $10^6$ , from red to blue, respectively, averaged over 200 independent KMC simulations for  $g' = 0.01, \sigma = 0$ . Other parameters are  $A = 30, J = 3, L_x = 512$ , and  $L_y = 300$ . Dashed line is the guide for the eye, illustrating  $k^{-1.7}$  behavior.
